RESEARCH ARTICLE

# The Clinical Significance of Glycoprotein Phospholipase D Levels in Distinguishing Early Stage Latent Autoimmune Diabetes in Adults and Type 2 Diabetes

Wen Qin<sup>1</sup>, Yu-Zhen Liang<sup>2</sup>, Bao-Yu Qin<sup>3</sup>, Jia-Li Zhang<sup>2</sup>, Ning Xia<sup>2\*</sup>

**1** Department of pathology, The First Affiliated Hospital of Guangxi Medical University, Nanning, Guangxi Province, China, **2** Department of Endocrinology and Metabolism, The First Affiliated Hospital of Guangxi Medical University, Nanning, Guangxi Province, China, **3** Department of Elderly Endocrinology, The First Affiliated Hospital of Guangxi Medical University, Nanning, Guangxi Province, China

\* [xianing12@sina.com](mailto:xianing12@sina.com)

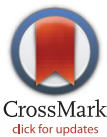

**OPEN ACCESS**

**Citation:** Qin W, Liang Y-Z, Qin B-Y, Zhang J-L, Xia N (2016) The Clinical Significance of Glycoprotein Phospholipase D Levels in Distinguishing Early Stage Latent Autoimmune Diabetes in Adults and Type 2 Diabetes. PLoS ONE 11(6): e0156959. doi:10.1371/journal.pone.0156959

**Editor:** Shengtao Zhou, West China Second Hospital, Sichuan University, CHINA

**Received:** February 15, 2016

**Accepted:** May 22, 2016

**Published:** June 28, 2016

**Copyright:** © 2016 Qin et al. This is an open access article distributed under the terms of the [Creative Commons Attribution License](https://creativecommons.org/licenses/by/4.0/), which permits unrestricted use, distribution, and reproduction in any medium, provided the original author and source are credited.

**Data Availability Statement:** All relevant data are within the paper and its Supporting Information files.

**Funding:** This work was supported by the National Natural Science Foundation of China (Grant No.81060070).

**Competing Interests:** The authors have declared that no competing interests exist.

## Abstract

Autoantibodies have been widely used as markers of latent autoimmune diabetes in adults (LADA); however, the specificity and sensitivity of autoantibodies as markers of LADA are weak compared with those found in type 1 diabetes (T1DM). In this study, we aimed to identify other plasma proteins as potential candidates that can be used effectively to determine early stage LADA and type 2 diabetes (T2DM) to facilitate early diagnosis and treatment. These issues were addressed by studying new-onset ‘classic’ T1DM (n = 156), LADA (n = 174), T2DM (n = 195) and healthy cohorts (n = 166). Plasma samples were obtained from the four cohorts. We employed isobaric tag for relative and absolute quantitation (iTRAQ) together with liquid chromatography tandem mass spectrometry (LC-MS) to identify plasma proteins with significant changes in LADA. The changes were validated by Western blot and ELISA analyses. Among the four cohorts, 311 unique proteins were identified in three iTRAQ runs, with 157 present across the three data sets. Among them, 49/311 (16.0%) proteins had significant changes in LADA compared with normal controls, including glycoprotein phospholipase D (GPLD1), which was upregulated in LADA. Western blot and ELISA analyses showed that GPLD1 levels were higher in both LADA and T1DM cohorts than in both T2DM and healthy cohorts, while there were no significant differences in the plasma concentrations of GPLD1 between the LADA and T1DM cohorts. GPLD1 is implicated as a potential candidate plasma protein for determining early stage LADA and T2DM.

## Introduction

Latent autoimmune diabetes in adults (LADA) accounts for 12% of all cases of diabetes in epidemiological studies, with an incidence two or three times greater than that of ‘classic’ type 1 diabetes mellitus (T1DM) in the general population[1]. However, this disorder is not well-

researched compared with classic T1DM and type 2 diabetes mellitus (T2DM)[2]. Since LADA shares a number of characteristics with classic T1DM, it is also known as latent T1DM or slowly progressive T1DM[3]. Furthermore, the treatment of LADA and T1DM is similar. However, due to the similarities in the clinical presentation of patients with T2DM or LADA in the early stages[4], many cases of LADA remain misclassified as T2DM. Furthermore, treatment requirements of patients with LADA may be different from those with T2DM[5] and their glycemic control is relatively poor[6]. Thus, distinguishing early stage LADA and T2DM is of great importance.

Currently, the diagnosis of LADA is based on the presence of four major circulating islet autoantibodies; glutamic acid decarboxylase autoantibodies (GADA), insulinoma-associated antigen-2 (IA-2A), insulin autoantibodies (IAA), and islet cell autoantibodies (ICA), which also exist in classic T1DM[7]. Among them, GADA is considered to be the most sensitive and specific biomarker of LADA[8]. Although the positive rate and titer of autoantibodies could be useful for risk stratification and accurate therapeutic choice in LADA[9], both parameters are relatively low in LADA patients compared with those in classic T1DM[10]. Furthermore, between 2% and 5% of patients with autoimmune diabetes (T1DM and LADA) are negative for the four classic antibodies (GADA, IA-2A, IAA, and ICA). Therefore, the search for novel candidate autoantibodies continues[11]. Although novel autoantibodies, such as those specific for zinc transporter 8 (ZnT8A)[12], have been identified, these potential biomarkers do not exhibit superior specificity and sensitivity in the detection of LADA. Thus, the identification of a new candidate plasma protein that can be used effectively to distinguish early stage LADA and T2DM is of great importance.

In this study, we employed iTRAQ proteomics, Western blotting, and ELISA to investigate the plasma of patients with LADA, classic T1DM, T2DM, and healthy adults, with the aim of identifying an ideal candidate plasma protein with the advantages of sensitivity and specificity in detecting LADA in the early stages.

## Materials and Methods

### Participants

A total of 174 LADA patients, 156 classic T1DM patients, 195 T2DM patients, and 166 healthy adults were enrolled as four cohorts in the study at the First Affiliated Hospital of Guangxi Medical University (China) from October 2011 to July 2014. LADA was diagnosed if: (1) the age at onset was >35 y; (2) At least one of four major circulating islet autoantibodies (GADA, ICA, IAA, IA-2A) was positive; and (3) insulin treatment was not started in the first 6 months after diagnosis. Individuals with T2DM were autoantibody-negative and insulin-independent at diagnosis. Patients with classic T1DM were autoantibody-positive and required prompt insulin therapy at diagnosis. The disease cohorts had been diagnosed with diabetes for  $\leq 6$  months and without diabetic complications. All patients were of Asian ancestry. The following exclusion criteria were applied: (1) Maternally Inherited Diabetes and Deafness (MIDD); (2) maturity-onset diabetes of the young (MODY); (3) gestational diabetes mellitus (GDM); and (4) other autoimmune diseases. The clinical characteristics of the participants are shown in [Table 1](#), [S1](#), [S2](#), [S3](#) and [S4](#) Tables.

### Ethics Statement

This study was approved by our Institutional Review Board (NO. EHBHKY 2011-KY-134), and informed patient consent was obtained before study participation according to institutional and native guidelines.

**Table 1. The clinical characteristics of the participants.**

|      | N   | Age (years)            | Sex (male/female) | Diabetes duration (months) | HbA1c (%)            | Glucose, fasting (mmol/l) | Glucose, non-fasting (mmol/l) | C-peptide, fasting (ng/ml) | C-peptide, non-fasting (ng/ml) | GADA(+) or ICA(+) or IAA (+) or IA-2A(+) |
|------|-----|------------------------|-------------------|----------------------------|----------------------|---------------------------|-------------------------------|----------------------------|--------------------------------|------------------------------------------|
| LADA | 174 | 37.2 ±5.0              | 96/78             | 4.8±1.1                    | 8.2±0.8              | 9.2±1.7                   | 15.8±1.5                      | 0.7±0.1                    | 1.3±0.2                        | 174                                      |
| T1DM | 156 | 12.2 ±3.8 <sup>a</sup> | 84/72             | 4.5±1.2                    | 8.6±0.8 <sup>a</sup> | 10.0±1.6 <sup>a</sup>     | 17.0±1.9 <sup>a</sup>         | 0.5±0.1 <sup>a</sup>       | 1.0±0.2 <sup>a</sup>           | 156                                      |
| T2DM | 195 | 38.2 ±4.7              | 111/84            | 4.7±1.2                    | 7.8±0.7 <sup>a</sup> | 9.0±1.2                   | 13.8±0.8 <sup>a</sup>         | 2.0±0.5 <sup>a</sup>       | 6.0±1.5 <sup>a</sup>           | 0                                        |
| NC   | 166 | 36.8 ±4.6              | 96/70             | -----                      | 5.1±0.4 <sup>a</sup> | 5.1±0.7 <sup>a</sup>      | 6.1±1.1 <sup>a</sup>          | 1.6±0.6 <sup>a</sup>       | 5.6±1.9 <sup>a</sup>           | 0                                        |

Data represent the number of cases or  $\bar{x} \pm s$  or *M*; \*\**P* < 0.01;

<sup>a</sup>compared with LADA, *P* < 0.05

Glucose, non-fasting: glucose 2 hours after a meal; C-peptide, non-fasting: C-peptide 2 hours after a meal

doi:10.1371/journal.pone.0156959.t001

### Specimen Collection

Blood samples were collected from the four groups after an overnight fast. Only newly diagnosed patients were involved in this study and blood samples were collected without medication. Blood was collected from each participant in K2 EDTA-coated tubes and centrifuged within 30 min of collection at 3,000 ×g for 5 min at 4°C. Aliquots of the plasma layer were then stored at -80°C.

Biochemical indexes such as GADA, ICA, IAA, IA-2A, fasting C-peptide levels, non-fasting C-peptide levels, fasting plasma glucose levels, non-fasting plasma glucose levels, and HbA1c were determined in each group. GADA, ICA, IAA and IA-2A levels was measured by ELISA. Samples selected for three iTRAQ runs were obtained from patients (matched for sex and biochemical indexes) with classic T1DM (n = 30), LADA (n = 30), T2DM (n = 30), and healthy adult controls (n = 30). Three pooled samples were created prior to immunodepletion of high-abundance proteins by the accumulation of 15 µl of each plasma sample from 10 patients in each group.

### Sample Preparation for Mass Spectrometry Analysis

**Removal of high-abundance proteins.** Potential candidate plasma protein for determining LADA and T2DM require enrichment as their heterogeneity and low abundance make them difficult to analyze from among a complex mixture. Enrichment strategies for low-abundance plasma proteins usually rely on immunodepletion of high-abundance proteins[13, 14]. In the present study the high-abundance proteins among three pooled samples were removed by human 14 multiple affinity removal system columns (Agilent Technologies, Palo Alto, CA, USA)[15]. The samples were then desalted and concentrated at 4°C by ultrafiltration using 3-kDa-cut-off membranes (Millipore, Barueri, Sao Paulo, Brazil). Sample concentrations were estimated by the Bradford method and then aliquoted (100 µg protein) into 1 ml centrifuge tubes for vacuum freeze-drying.

**Protein digestion and iTRAQ labeling.** According to the standard protocol supplied by the manufacturer (Applied Biosystems, Foster City, CA, USA), 100 µg of freeze-dried protein samples were redissolved, denatured, reduced, the cysteines blocked, and digested. Each iTRAQ reagent (Applied Biosystems) was then dissolved in 50 µl isopropanol, vortexed and added to each sample pool for incubation (≥2 h at room temperature). Isobaric tags, 114, 116, 117, and 118 m/z, were added to the T2DM, LADA, classic type 1 diabetes, and healthy adults

sample pool, respectively, according to the manufacturer's instructions. Samples were then mixed in equal ratios and dried in a centrifugal vacuum concentrator to remove isopropanol.

**Strong cation exchange fractionation.** Following desalination by C18 Micro spin columns (Ultra Micro Spin Column 2–100  $\mu$ l) and vacuum drying at low temperature, the samples were fractionated off-line on a strong cation exchange (SCX) column (PolyLC, Columbia, USA). Redissolved samples were added and peptides were then eluted stepwise with solutions of increasing concentration of KCl (200 mM, 400 mM, and 500 mM) in 10 mM  $\text{KH}_2\text{PO}_4$ , 25% acetonitrile, pH 3.0. Fractions were collected every 2 to 5 min and combined into 21 fractions depending on the intensity of UV absorbance at 214 nm. Fractions were dried by vacuum centrifugation.

## LC-MS/MS Analysis

All strong cation exchange (SCX) was performed under the following conditions: column size =  $150 \times 2.1$  mm, 5  $\mu$ m, 200  $\text{\AA}$ , flow rate = 0.2 ml/min, PolySulfethyl A; PolyLC. Fractions were analyzed on a Tempo™ LC-MALDI spotting system (Applied Biosystems). Peptides were separated at a flow rate of 2  $\mu$ l/min, eluted with a 90 min gradient from 8%–40% mobile phase B (98% acetonitrile, 0.1% trifluoroacetic acid) and monitored by UV absorbance at 214 nm. Peptide-containing LC spots were submitted to a 5800 MALDI TOF/TOF™ analyzer (Applied Biosystems). MS full-scan spectra were acquired from 800–4,000 m/z. Data-dependent tandem MS settings included acquisition of up to 20 of the most intense ion signals per spot. Raw data processing, protein identification, protein relative quantitation and statistical analyses were undertaken with ProteinPilot Software Version 4.0 (Applied Biosystems) against the UniProt database. Protein confidence was set at 95% (equivalent to Unused ProtScore of 1.3). Proteins were accepted with a false discovery rate (FDR) of 1%. Only the proteins identified from three iTRAQ runs with  $P$ -values  $< 0.05$  (compared with the LADA cohort) and at least two peptides were accepted as unique. Only proteins with a relative expression ratio of  $\leq 0.8$ - or  $\geq 1.2$  between two groups were accepted as significantly down- or upregulated [16, 17].

## Functional Annotation of Proteins

To select plasma proteins as potential candidates for early diagnosis of LADA, we used the web tools provided by the DAVID (<http://david.abcc.ncifcrf.gov/>), UniProt (<http://www.uniprot.org/>), and KEGG databases (<http://www.genome.jp/kegg/>) to search for functional annotation terms (FATs) and pathways that are enriched among the identified differentially expressed proteins.

## Western Blot Analysis

Aliquots of plasma were fractionated by SDS-polyacrylamide gel electrophoresis and transferred to PVDF membranes (0.2  $\mu$ m; Millipore). After blocking in 5% non-fat milk at room temperature for 2 h and washing with PBST (3 $\times$ 5 min), membranes were incubated with the primary detection antibody (ab51356, mouse-anti-human glycoprotein phospholipase D monoclonal antibody (GPLD1), Abcam, Cambridge, UK) diluted 1:500. Membranes were washed three times in PBST before being incubated with IRDye 800CW secondary antibodies (926–32210, goat (polyclonal) anti-mouse IgG (H+L), 1:5,000, LI-COR Biosciences, Lincoln, USA) in blocking buffer for 2 h. Detection was performed with the Odyssey imaging system (LI-COR Biosciences, Lincoln, USA). GPLD1 isolated from human plasma was used as a positive control. C3b- $\alpha$  was used as a loading control.

## ELISA

Plasma GPLD1 concentrations were assayed using an anti-human GPLD1 ELISA kit (USCN Life Sciences, Wuhan, China) in accordance with the manufacturer's instructions. The absorbance was read at 450 nm on a microplate reader (Bio-Rad, Hercules, USA).

## Statistical Analysis

Statistical analysis was performed using SPSS 19.0 statistical software. Normal distribution was confirmed for all variables using the Kolmogorov-Smirnov test. Normally distributed data were expressed as the mean  $\pm$  SD. The SNK-q test was used for comparisons between multiple groups. The attribute data were analyzed by chi-square test. Receiver operating characteristic (ROC) curve analysis was used to assess the discriminating power of plasma GPLD1 levels to detect LADA. *P*-values  $< 0.05$  were considered to indicate statistical significance.

## Results

This study identified and quantified 311 plasma proteins in three iTRAQ runs; 157 of them were present across the three data sets in the LADA and normal control groups. Statistical analysis revealed 49 proteins with significant changes in abundance in the LADA group compared with the normal control group (Table 2). Fig 1 shows the interactions among the 49 proteins. Candidate proteins were selected for further validation studies based on the following criteria: (1) the candidate proteins should not be among the 14 high-abundance proteins that were removed by the Agilent human 14 multiple affinity removal system columns; (2) potential biological relevance to diabetes determined by literature reviews; and (3) raw concentration of protein in plasma higher than 2 fm/L (equivalent to approximately 0.1 ng of a 50 kDa protein), which is within the range of Western blot detection limits. According to these criteria and bioinformatics analysis (Table 3), subsequent studies were focused on GPLD1, APOC3, CD14, KLKB1, and SERPING1, which exhibited differential expression in both the LADA and T1DM cohorts when compared with the T2DM and normal control cohorts. Although the results indicated that CD14 participates in the mechanisms of a large number of human diseases, this marker lacked specificity. It has been reported that APOC3 is involved in type 2 diabetes. KLKB1 and SERPING1 are involved in complement and coagulation cascades. Thus, these markers were not considered to be relevant to the development of LADA and T2DM, leaving GPLD1 as the only potential biomarker.

## Candidate Verification by Western Blot Analysis

GPLD1 was selected for further investigation based on the results of the iTRAQ and LC-MS analyses. Western blot analysis was used to further confirm the changes in plasma GPLD1 levels. The predicted band-size of GPLD1 is 92 kDa; however, the circulating GPLD1 protein is approximately 140 kDa due to post-translational modification. A band of approximately 140 kDa was detected by Western blot in each plasma sample. Different levels of GPLD1 expression were observed in each group. All experiments were performed in triplicate and GPLD1 isolated from human plasma was used as a positive control. Western blot analysis showed that the relative expression of GPLD1 among the four cohorts [LADA ( $n = 174$ ), classic type 1 diabetes ( $n = 156$ ), T2DM ( $n = 195$ ) and normal controls ( $n = 166$ )] was  $0.84 \pm 0.02$ ,  $0.88 \pm 0.02$ ,  $0.59 \pm 0.01$ , and  $0.60 \pm 0.01$ , respectively. No significant differences were observed between the LADA and classic T1DM cohorts ( $P > 0.05$ ). However, GPLD1 levels were significantly higher in the LADA cohort compared with those in the T2DM and normal control cohorts ( $P < 0.05$ ). (Fig 2). These findings were consistent with the iTRAQ results.

**Table 2. Results of iTRAQ for 49 proteins with significant changes in LADA compared with controls.**

|    | Accession | Name     | 114:116<br>(T2DM:LADA) | PVal 114:116 (PVal<br>T2DM:LADA) | 117:116<br>(T1DM:LADA) | PVal 117:116 (PVal<br>T1DM:LADA) | 118:116<br>(Normal:LADA) | PVal 118:116 (PVal<br>normal:LADA) |
|----|-----------|----------|------------------------|----------------------------------|------------------------|----------------------------------|--------------------------|------------------------------------|
| 1  | P01008    | ANT3     | 0.1995                 | 0.0000                           | 0.7798                 | 0.0412                           | 0.5297                   | 0.0105                             |
| 2  | P06727    | APOA4    | 0.8941                 | 0.0983                           | 0.7987                 | 0.0460                           | 0.7037                   | 0.0407                             |
| 3  | P01042    | KNG1     | 0.8628                 | 0.1276                           | 0.9769                 | 0.4192                           | 0.7796                   | 0.0453                             |
| 4  | P25311    | ZA2G     | 0.4365                 | 0.0095                           | 0.5445                 | 0.0238                           | 0.7112                   | 0.0481                             |
| 5  | P10909    | CLUS     | 0.1995                 | 0.0000                           | 0.9204                 | 0.4239                           | 0.6982                   | 0.0368                             |
| 6  | P03952    | KLKB1    | 0.6207                 | 0.0234                           | 0.9376                 | 0.4525                           | 0.4043                   | 0.0093                             |
| 7  | P05155    | SERPING1 | 0.5754                 | 0.0140                           | 0.9908                 | 0.4615                           | 0.2871                   | 0.0064                             |
| 8  | Q06033    | ITIH3    | 0.7047                 | 0.0401                           | 1.0765                 | 0.4720                           | 0.7379                   | 0.0409                             |
| 9  | P08185    | CBG      | 0.6026                 | 0.0215                           | 1.1482                 | 0.2728                           | 0.7047                   | 0.0432                             |
| 10 | P05543    | THBG     | 0.7047                 | 0.0401                           | 1.0375                 | 0.4325                           | 0.7311                   | 0.0440                             |
| 11 | P27169    | PON1     | 0.1941                 | 0.0000                           | 0.7656                 | 0.0426                           | 0.6792                   | 0.0324                             |
| 12 | P23142    | FBLN1    | 0.7244                 | 0.0423                           | 1.2134                 | 0.0497                           | 0.6668                   | 0.0391                             |
| 13 | P08519    | APOA     | 0.9833                 | 0.1320                           | 0.7768                 | 0.0438                           | 0.5792                   | 0.0236                             |
| 14 | P80108    | GPLD1    | 0.5208                 | 0.0194                           | 0.9503                 | 0.4562                           | 0.5301                   | 0.0125                             |
| 15 | P01880-2  | IGHD     | 1.0264                 | 0.2310                           | 0.6090                 | 0.0397                           | 0.4132                   | 0.0099                             |
| 16 | A8K660    | A8K660   | 0.8381                 | 0.0952                           | 1.1264                 | 0.4631                           | 0.7305                   | 0.0420                             |
| 17 | P48740    | MASP1    | 0.6668                 | 0.0285                           | 0.8318                 | 0.1800                           | 0.6252                   | 0.0317                             |
| 18 | P55058    | PLTP     | 0.7311                 | 0.0476                           | 1.2246                 | 0.0438                           | 0.5297                   | 0.0105                             |
| 19 | Q15848    | ADIPO    | 0.7870                 | 0.0489                           | 1.0765                 | 0.4562                           | 0.7656                   | 0.0406                             |
| 20 | P22105    | TENX     | 0.6792                 | 0.0271                           | 0.9817                 | 0.4678                           | 0.7586                   | 0.0412                             |
| 21 | P01717    | LV403    | 0.8880                 | 0.0800                           | 0.5970                 | 0.0152                           | 0.7964                   | 0.0489                             |
| 22 | P27824    | CALX     | 0.7311                 | 0.0412                           | 0.8790                 | 0.0472                           | 0.5916                   | 0.0288                             |
| 23 | P00738    | HPT      | 1.6904                 | 0.0008                           | 1.7865                 | 0.0092                           | 3.3729                   | 0.0000                             |
| 24 | P02749    | APOH     | 0.9198                 | 0.1478                           | 0.7917                 | 0.0486                           | 1.2196                   | 0.0476                             |
| 25 | P20742    | PZP      | 1.5091                 | 0.0019                           | 0.9166                 | 0.4178                           | 1.2047                   | 0.0491                             |
| 26 | P02649    | APOE     | 2.8840                 | 0.0000                           | 2.5119                 | 0.0000                           | 2.1677                   | 0.0000                             |
| 27 | P01860    | IGHG3    | 1.0848                 | 0.2820                           | 0.7549                 | 0.0493                           | 1.8542                   | 0.0009                             |
| 28 | Q5VVQ8    | Q5VVQ8   | 0.8821                 | 0.0793                           | 1.0055                 | 0.6210                           | 1.3084                   | 0.0253                             |
| 29 | D9YZU5    | D9YZU5   | 0.9760                 | 0.3361                           | 1.0594                 | 0.6210                           | 1.2446                   | 0.0400                             |
| 30 | P02656    | APOC3    | 2.2909                 | 0.0000                           | 1.4859                 | 0.0078                           | 1.7701                   | 0.0052                             |
| 31 | P02763    | A1AG1    | 1.6881                 | 0.0009                           | 1.1056                 | 0.6170                           | 1.5502                   | 0.0081                             |
| 32 | P05156    | CFAI     | 0.9817                 | 0.1528                           | 0.9640                 | 0.6531                           | 1.2131                   | 0.0476                             |
| 33 | P43251    | BTD      | 1.2738                 | 0.0329                           | 0.9246                 | 0.5177                           | 1.2376                   | 0.0476                             |
| 34 | P07360    | CO8G     | 0.9001                 | 0.1457                           | 0.9860                 | 0.5346                           | 1.2461                   | 0.0391                             |
| 35 | P02655    | APOC2    | 1.5364                 | 0.0013                           | 1.3317                 | 0.0146                           | 1.2047                   | 0.0480                             |
| 36 | D1MGQ2    | D1MGQ2   | 1.0106                 | 0.1893                           | 1.0987                 | 0.5199                           | 1.2150                   | 0.0474                             |
| 37 | P02735    | SAA      | 1.4588                 | 0.0069                           | 0.3048                 | 0.0000                           | 6.7920                   | 0.0000                             |
| 38 | P18136    | KV313    | 1.4060                 | 0.0053                           | 0.7379                 | 0.0467                           | 1.4454                   | 0.0179                             |
| 39 | P08571    | CD14     | 2.1878                 | 0.0000                           | 1.3305                 | 0.0260                           | 1.5276                   | 0.0083                             |
| 40 | P01623    | KV305    | 1.1847                 | 0.0900                           | 0.9273                 | 0.4274                           | 1.2100                   | 0.0455                             |
| 41 | Q08380    | LG3BP    | 1.2474                 | 0.0432                           | 1.1803                 | 0.2140                           | 1.3552                   | 0.0274                             |
| 42 | P06314    | KV404    | 1.1144                 | 0.1537                           | 1.0583                 | 0.5380                           | 1.3027                   | 0.0365                             |
| 43 | O43866    | CD5L     | 0.8720                 | 0.0752                           | 0.9814                 | 0.4150                           | 1.4306                   | 0.0210                             |
| 44 | B4DVE1    | B4DVE1   | 1.2646                 | 0.0455                           | 1.1683                 | 0.3147                           | 1.2182                   | 0.0401                             |
| 45 | Q6UXB8    | PI16     | 2.7040                 | 0.0000                           | 0.8630                 | 0.2145                           | 6.0813                   | 0.0000                             |
| 46 | P04208    | LV106    | 1.4859                 | 0.0107                           | 1.1912                 | 0.0657                           | 1.2942                   | 0.0396                             |

(Continued)

Table 2. (Continued)

| Accession | Name   | 114:116 (T2DM:LADA) | PVal 114:116 (PVal T2DM:LADA) | 117:116 (T1DM:LADA) | PVal 117:116 (PVal T1DM:LADA) | 118:116 (Normal:LADA) | PVal 118:116 (PVal normal:LADA) |        |
|-----------|--------|---------------------|-------------------------------|---------------------|-------------------------------|-----------------------|---------------------------------|--------|
| 47        | P00746 | CFAD                | 2.2909                        | 0.0000              | 0.8166                        | 0.2769                | 2.1878                          | 0.0000 |
| 48        | Q9HCU4 | CELR2               | 12.2462                       | 0.0000              | 5.2000                        | 0.0000                | 7.2444                          | 0.0000 |
| 49        | P07359 | GP1BA               | 20.1372                       | 0.0000              | 21.6770                       | 0.0000                | 9.4624                          | 0.0000 |

doi:10.1371/journal.pone.0156959.t002

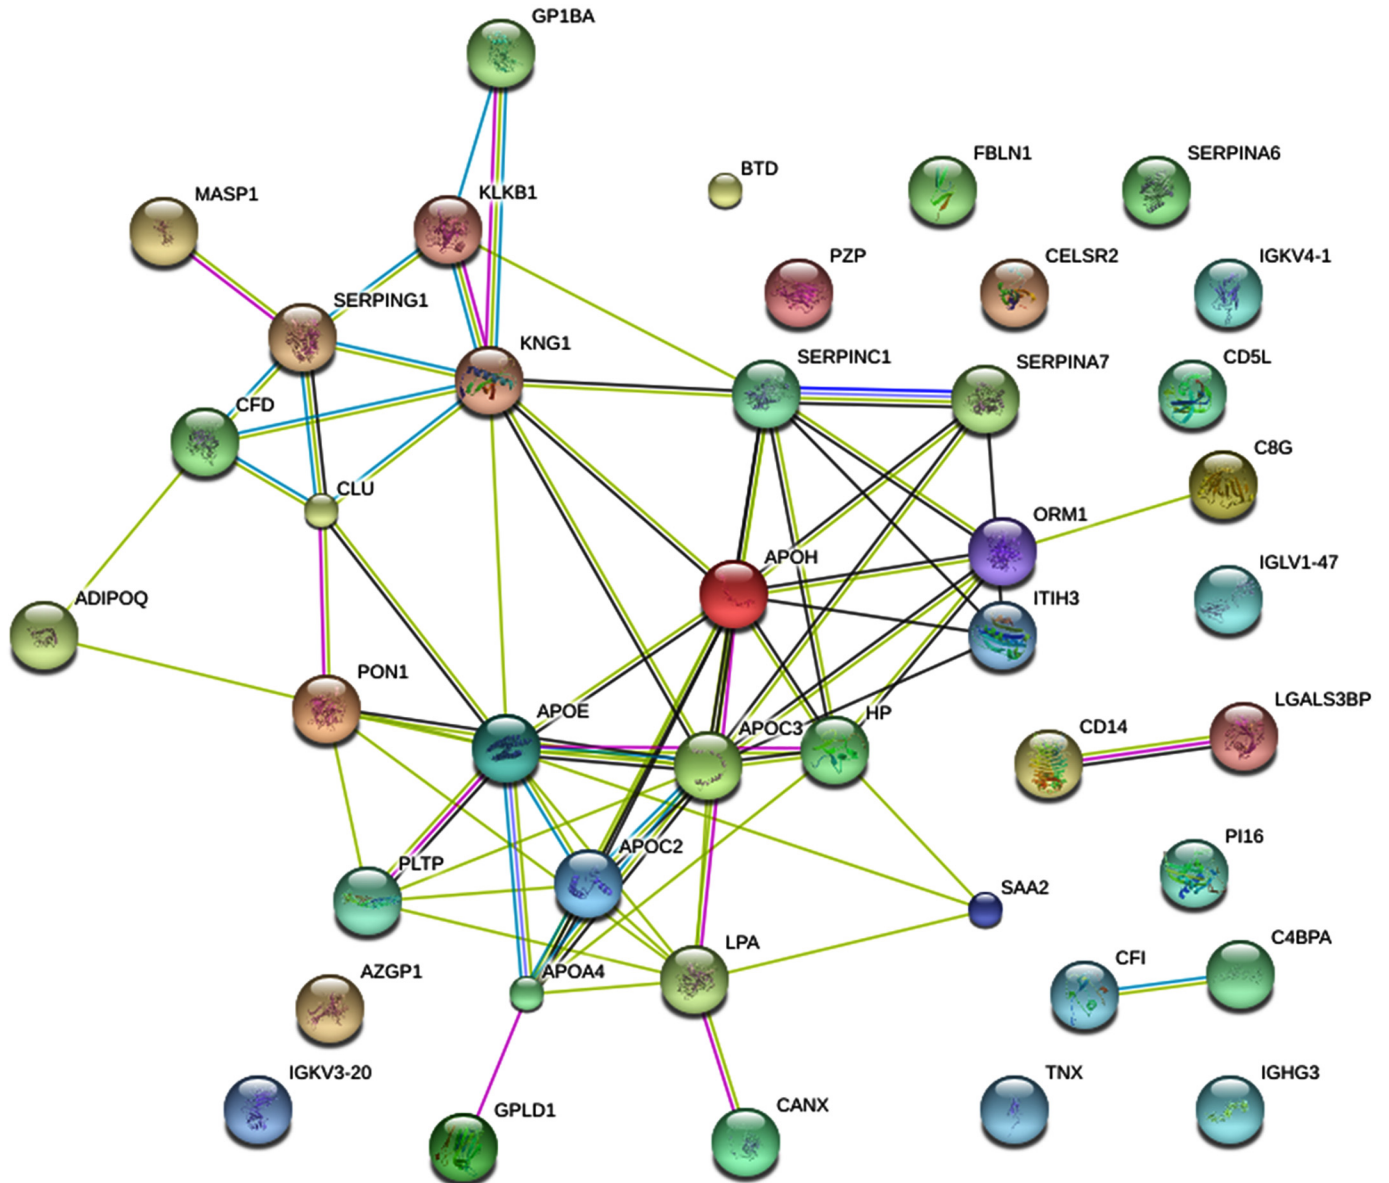

**Fig 1. Protein-protein interactions among differentially expressed proteins predicted by ‘String’.** Protein-protein interaction The interactions include direct (physical) and indirect (functional) associations and are derived from four sources: genomic context, high-throughput experiments, (conserved) coexpression, and previous knowledge. GPLD1 associates with the most intense protein interaction network group.

doi:10.1371/journal.pone.0156959.g001

**Table 3. Significant signaling pathway and proteins implicated in LADA.**

|          | Pathway                                                | Protein         |
|----------|--------------------------------------------------------|-----------------|
| hsa03320 | PPAR signaling pathway                                 | APOC3           |
| hsa04610 | Complement and coagulation cascades                    | KLKB1, SERPING1 |
| hsa04010 | MAPK signaling pathway                                 | CD14            |
| hsa04620 | Toll-like receptor signaling pathway                   | CD14            |
| hsa04930 | Type II diabetes mellitus                              | APOC3           |
| hsa04145 | Phagosome                                              | CD14            |
| hsa00563 | Glycosylphosphatidylinositol (GPI)-anchor biosynthesis | GPLD1           |

doi:10.1371/journal.pone.0156959.t003

### Candidate Verification by ELISA

The ELISA results provided a curvilinear plot covering a range of 0.78–50 ng/ml. GPLD1 concentration was found to be highly correlated with the optical density (correlation coefficient, 0.9991). GPLD1 concentrations in the four cohorts [LADA (n = 174), classic T1DM (n = 156), T2DM (n = 195) and normal controls (n = 166)] were 218.09±35.56 µg/ml, 222.67±38.62 µg/ml, 155.85±37.94 µg/ml, and 162.88±34.66 µg/ml, respectively. There was no significant difference between the concentrations in the LADA and classic T1DM cohorts ( $P > 0.05$ ). However, GPLD1 levels were significantly higher in the LADA cohort compared with those in the T2DM and normal control cohorts ( $P < 0.05$ ). The results of the ELISA and Western blot analyses

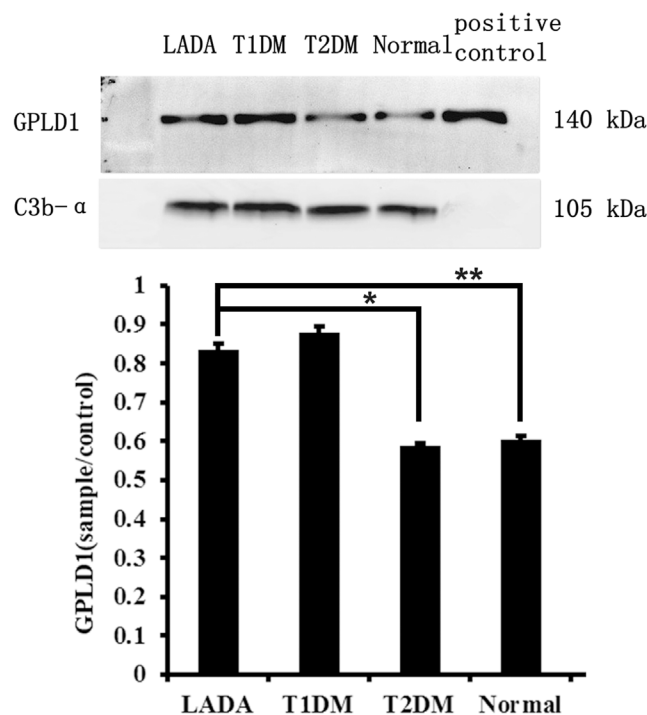

**Fig 2. Western blot analysis of the relative expression of GPLD1 among the four cohorts.** GPLD1 isolated from human plasma was used as a positive control. No significant difference in GPLD1 expression was observed between the LADA and 'classic' type 1 diabetes cohorts ( $P > 0.05$ ); however, there were significant differences between the LADA cohort and the type 2 diabetes and normal control cohorts ( $P < 0.05$ ).

doi:10.1371/journal.pone.0156959.g002



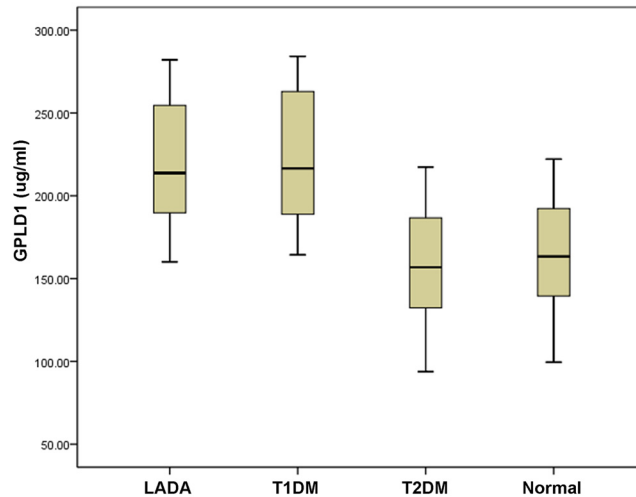

**Fig 3. ELISA analysis of the concentration of GPLD1 among the four cohorts.** No significant difference in GPLD1 expression was observed between the LADA and 'classic' type 1 diabetes cohorts ( $P > 0.05$ ); however, there were significant differences between the LADA cohort and the type 2 diabetes and normal control cohorts ( $P < 0.05$ ).

doi:10.1371/journal.pone.0156959.g003

were comparable and consistent with our proteomics data, demonstrating significant GPLD1 upregulation in the LADA cohort (Fig 3).

### A Comparison of the Diagnostic Value of GPLD1 and GADA in LADA

As shown in Fig 4 and Table 4, the ROC curve was obtained by testing the concentrations of GPLD1 and GADA in the LADA, T1DM, T2DM and healthy control cohorts.

### Discussion

Autoantibodies are frequently found during the preclinical period of T1DM [18] and LADA [19]. These disorders share similar autoantibodies and clinical management and are not difficult to distinguish due to differences in the age at onset of diabetes. However, it is difficult to distinguish early stage LADA and T2DM in adults due to the similarities in clinical features; therefore, many cases of early stage LADA remain misclassified as T2DM. Thus, identification of a plasma protein for more efficient distinction between early stage LADA and T2DM is of great importance.

In this study, we employed iTRAQ and LC-MS to identify proteins showing significant changes in expression in LADA. We identified 311 unique proteins in three iTRAQ runs, with 157 present across the three data sets in the LADA and normal control groups. Among them, 49/311 (16.0%) proteins showed significant changes, including GPLD1, which was upregulated in both the LADA and T1DM cohorts compared with the T2DM and normal control cohorts. These results were further validated by Western blot and ELISA analyses. For all cases of incipient diabetes (Table 1), GPLD1 distinguished T2DM and LADA in the early stage. Moreover, there were no significant differences in the plasma concentrations of GPLD1 between the LADA and T1DM cohorts, indicating that, unlike the four autoantibodies currently used as markers, GPLD1 can be used to detect LADA and T1DM with equal efficiency. It was shown that GPLD1 can be used to determine LADA and T2DM cohorts, LADA and healthy cohorts with high diagnostic value in the ROC curve. However, the sensitivity and specificity of GADA was slightly higher than that of GPLD1 (Table 4). Our investigation of the significance of

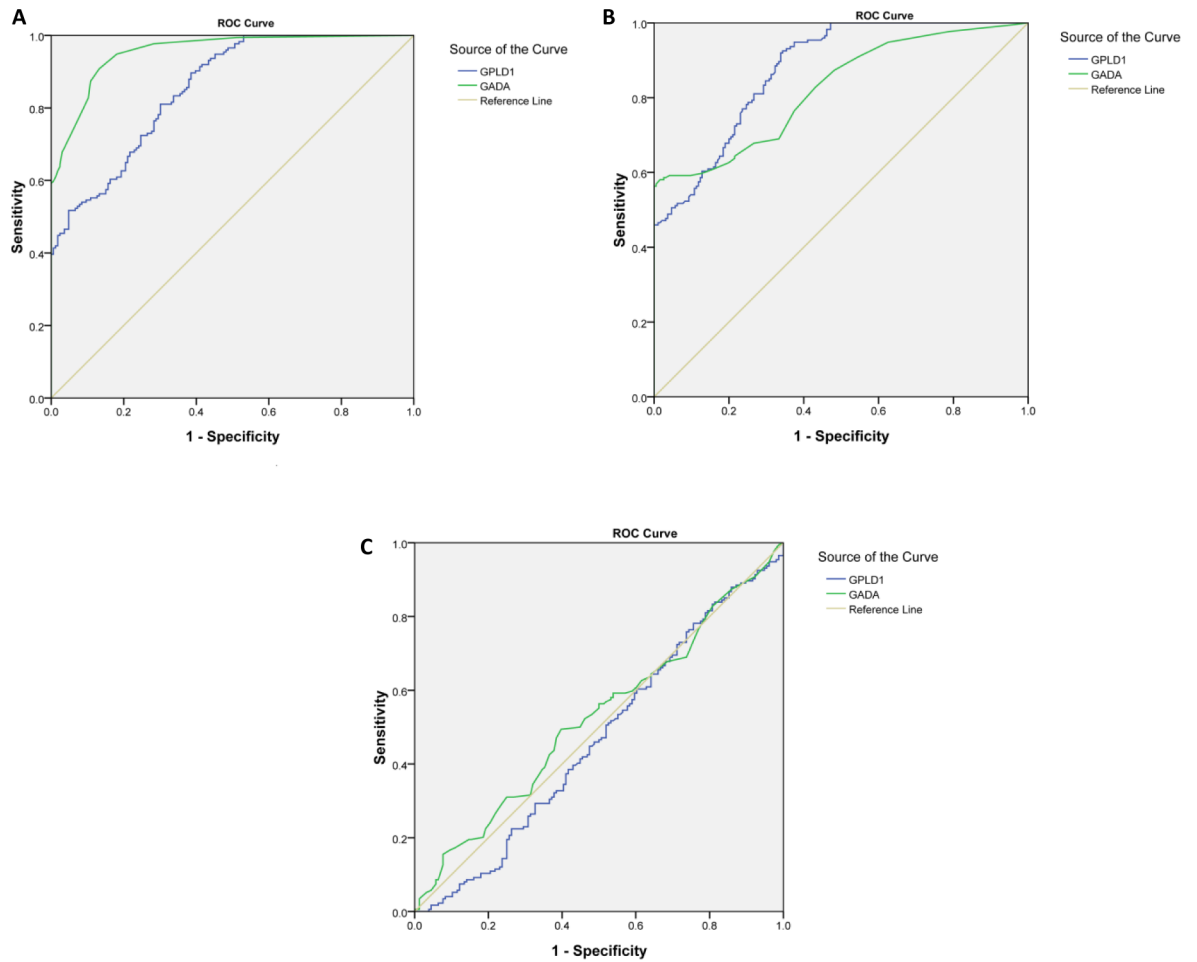

**Fig 4. A comparison of the diagnostic value of GPLD1 and GADA in LADA. (A) ROC curve obtained in LADA and healthy cohorts. (B) ROC curve obtained in LADA and T2DM cohorts. (C) ROC curve obtained in LADA and T1DM cohorts.**

doi:10.1371/journal.pone.0156959.g004

**Table 4. Results of the ROC curve.**

|              | ROC curve obtained in LADA and healthy cohorts | ROC curve obtained in LADA and T2DM cohorts | ROC curve obtained in LADA and T1DM cohorts |
|--------------|------------------------------------------------|---------------------------------------------|---------------------------------------------|
| <b>GPLD1</b> |                                                |                                             |                                             |
| Cut-off      | 211.269                                        | 213.846                                     | 216.536                                     |
| Sensitivity  | 51.7%                                          | 50.0%                                       | 46.6%                                       |
| Specificity  | 95%                                            | 95%                                         | 50%                                         |
| AUC          | 0.854 (CI 95% 0.816–0.892)                     | 0.877(CI 95% 0.844–0.909)                   | 0.468(CI 95% 0.405–0.531)                   |
| <b>GADA</b>  |                                                |                                             |                                             |
| Cut-off      | 0.08 (antibody titer)                          | 0.21 (antibody titer)                       | 0.33 (antibody titer)                       |
| Sensitivity  | 69.0%                                          | 59.2%                                       | 56.3%                                       |
| Specificity  | 96%                                            | 96%                                         | 50%                                         |
| AUC          | 0.955 (CI 95% 0.936–0.974)                     | 0.824(CI 95% 0.781–0.866)                   | 0.525(CI 95% 0.462–0.587)                   |

doi:10.1371/journal.pone.0156959.t004

GPLD1 showed that the changes in the expression of GPLD1 and GADA was not always consistent. For example, some cases of LADA or T1DM tested positive for GADA but negative for GPLD1, while the reverse was true in some other cases. Thus, GPLD1 may be useful for diagnosis in some cases.

Previous research has shown that GPLD1 mRNA and protein levels are increased in mice that develop insulin-dependent T1DM spontaneously[20, 21]. However, the etiology of pre-clinical LADA[19] and the mechanisms underlying the changes in plasma concentrations of GPLD1 remain to be elucidated.

GPLD1 is a mammalian plasma protein (110–120 kDa). Liver and pancreatic islets are two likely sources of GPLD1 and GPLD1 cDNA has been isolated from both organs in multiple species. However, studies have demonstrated that brain, kidney, muscle, immunocytes, and inflammatory cells may also be sources[22]. The expression of GPLD1 mRNA in liver is higher than that in other organs[20]. The *GPLD1* gene, which is located on chromosome 6 and consists of 25 exons and was previously designated as the pancreatic form (EMBL/GenBank/DDBJ accession number L11702), is the only *GPLD1* gene in humans[23]. *GPLD1* is linked to susceptibility to pancreatic and gastric malignancies[24] and genetic variations are known to influence plasma GPLD1 levels[25]. The close relationship between GPLD1 and pancreatic islets might be an important cause of the increased plasma concentrations of GPLD1 among patients with LADA or T1DM.

As a hydrolase in the glycosylphosphatidylinositol-anchor biosynthesis pathway, GPLD1 releases GPI-anchored membrane proteins by hydrolyzing the anchor before and after its attachment to proteins. The GPI-anchor is a post-translational modification that covalently links many proteins to membranes, occurring in a wide variety of eukaryotes from yeast to mammals. In mammals, the GPI-anchor attaches many functional proteins, such as enzymes, receptors, cell adhesion molecules and differentiation antigens to cellular membranes[26]. It has been shown that the increasing release of GPI-anchor-dependent membrane proteins is associated with breast carcinoma[27]. GPLD1 has also been implicated in the mechanism underlying the involvement of GPLD1 in carcinoembryonic antigen (CEA) release from human colon cancer cells[28, 29].

Consequently, the potential role of GPLD1 in LADA is a current concern. It is well-known that GAD65, a predominant form of GAD in the pancreas, is important in LADA and classic T1DM. Although previous studies have shown that LADA patients tend to be GAD antibody-positive, the mechanism responsible for the generation of these antibodies is largely unknown. Interestingly, GAD<sub>65</sub> is a soluble cytosolic protein which can be anchored to the membranes [30] and released from the membrane through changes in enzyme activity. Moreover, the correlation in the timing between GPLD1 upregulation and the emergence of GADA highlights the potential relationship between these two events. Therefore, the ability of GPLD1 to cleave GAD<sub>65</sub> or anti-GAD from the GPI-anchor leading to LADA represents an issue for further investigation. It can be speculated that the development of other autoantibodies found in LADA might be explained by the same mechanism. Furthermore, accumulating evidence supports the associations among autoimmune diseases, with autoimmune co-morbidity typically involving T1DM or autoimmune thyroid disease (AITD) and multiple sclerosis; inflammatory bowel disease (IBD), T1DM or AITD and rheumatoid arthritis; or T1DM and AITD[31]. Moreover, the strong association of other autoimmune diseases with LADA, such as AITD or autoimmune Addison's disease[32], suggests that they share a common underlying mechanism, which might be similar to that described involving the function of GPLD1 in GPI-anchor hydrolysis and the release of GPI-anchored proteins leading to the development of autoantibodies.

In addition, the potential regulatory role of GPLD1 in chronic inflammatory reactions might be another mechanism underlying the development of LADA. Previous data suggests that chronic inflammation of pancreatic islets is connected with the pathogenesis of T1DM [33]. In T1DM, the components of the inflammatory responses that contribute to  $\beta$ -cell destruction include  $CD4^+$  and  $CD8^+$  T-cells, macrophages, and natural killer (NK) cells. The potential relationship between islet cell autoimmunity and inflammatory markers may be similar in LADA. It is possible that by hydrolyzing the GPI anchors of some inflammatory membrane proteins and upregulating macrophage cytokine expression, GPLD1 may play an important role in inflammation and in the pathogenesis of LADA. Furthermore, GPLD1, localized mainly in the Golgi, endoplasmic reticula, and vesicles, may enter the MHC-I processing pathway, depending on specific genes related to IDDM [34]. Other reports have indicated that the relationship between plasma GPLD1 and insulin resistance is controversial [35].

## Conclusion

In summary, several possibilities may explain the relationship between GPLD1 and LADA, including the release of antigens or antibodies by GPI-anchor hydrolysis, leading to chronic inflammation as a result of entry into the MHC-I processing pathway. It is possible that GPLD1 is not only a candidate plasma protein in determining early stage LADA and T2DM, but also a critical factor involved in the pathogenesis of LADA. As a functional enzyme, GPLD1 provides a significant advantage as a candidate plasma protein marker of early stage LADA and T2DM. First, accumulating evidence suggests that disease progression does not occur in the absence of a set of functional enzymes. Second, enzymes are relatively stable in vivo under normal conditions, while in contrast, they exhibit changes in stability under pathological conditions. A variety of enzymes, including amylase, aminotransferase, lactic dehydrogenase, and creatine phosphokinase, have been used as biomarkers in clinical practice.

Our data are the first to indicate the correlation between GPLD1 and early stage LADA. Among the established diagnostic methods, GADA has higher sensitivity and specificity than GPLD1, although GPLD1 may still be a promising candidate plasma protein for distinguishing between early stage LADA and T2DM. The early diagnosis of LADA could be important in determining the most appropriate therapeutic choice in clinical practice. Our data strongly support the conclusion that proteomics is a feasible strategy for the identification of candidate plasma proteins for early diagnosis of LADA. In this study, we provide preliminary evidence demonstrating the potential of GPLD1 as a candidate plasma protein that can be used effectively to distinguish between early stage LADA and T2DM. However, mechanistic studies of the signaling pathways implicated in this process are required and the clinical utility of GPLD1 requires confirmation in a further multicenter study. In addition, this research was conducted in an Asian population and the results should be confirmed in other ethnicities.

## Supporting Information

**S1 Table. The clinical characteristics of 174 LADA patients.** Biochemical indexes such as GPLD1, GADA, fasting C-peptide levels, non-fasting C-peptide levels, fasting plasma glucose levels, non-fasting plasma glucose levels, and HbA1c were determined in each patient. (XLS)

**S2 Table. The clinical characteristics of 156 classic T1DM patients.** Biochemical indexes such as GPLD1, GADA, fasting C-peptide levels, non-fasting C-peptide levels, fasting plasma glucose levels, non-fasting plasma glucose levels, and HbA1c were determined in each patient. (XLS)

**S3 Table. The clinical characteristics of 195 T2DM patients.** Biochemical indexes such as GPLD1, GADA, fasting C-peptide levels, non-fasting C-peptide levels, fasting plasma glucose levels, non-fasting plasma glucose levels, and HbA1c were determined in each patient. (XLS)

**S4 Table. The clinical characteristics of 166 healthy adults.** Biochemical indexes such as GPLD1, GADA, fasting C-peptide levels, non-fasting C-peptide levels, fasting plasma glucose levels, non-fasting plasma glucose levels, and HbA1c were determined in each patient. (XLS)

## Author Contributions

Conceived and designed the experiments: WQ NX. Performed the experiments: WQ Y-ZL. Analyzed the data: WQ B-YQ Y-ZL. Contributed reagents/materials/analysis tools: J-LZ. Wrote the paper: WQ.

## References

1. Maddaloni E, Lessan N, Al Tikriti A, Buzzetti R, Pozzilli P, Barakat MT. Latent Autoimmune Diabetes in Adults in the United Arab Emirates: Clinical Features and Factors Related to Insulin-Requirement. *PLoS One*. 2015; 10: e0131837. doi: [10.1371/journal.pone.0131837](https://doi.org/10.1371/journal.pone.0131837) PMID: [26252955](https://pubmed.ncbi.nlm.nih.gov/26252955/)
2. Pham MN, Hawa MI, Pflieger C, Roden M, Scherthaner G, Pozzilli P, et al. Pro- and anti-inflammatory cytokines in latent autoimmune diabetes in adults, type 1 and type 2 diabetes patients: Action LADA 4. *Diabetologia*. 2011; 54: 1630–1638. doi: [10.1007/s00125-011-2088-6](https://doi.org/10.1007/s00125-011-2088-6) PMID: [21347621](https://pubmed.ncbi.nlm.nih.gov/21347621/)
3. Itariu BK, Stulnig TM. Autoimmune aspects of type 2 diabetes mellitus—a mini-review. *Gerontology*. 2014; 60: 189–196. doi: [10.1159/000356747](https://doi.org/10.1159/000356747) PMID: [24457898](https://pubmed.ncbi.nlm.nih.gov/24457898/)
4. Report of the expert committee on the diagnosis and classification of diabetes mellitus. *Diabetes Care*. 2003; 26 Suppl 1: S5–20. PMID: [12502614](https://pubmed.ncbi.nlm.nih.gov/12502614/)
5. Brophy S, Davies H, Mannan S, Brunt H, Williams R. Interventions for latent autoimmune diabetes (LADA) in adults. *Cochrane Database Syst Rev*. 2011: Cd006165. doi: [10.1002/14651858.CD006165.pub3](https://doi.org/10.1002/14651858.CD006165.pub3) PMID: [21901702](https://pubmed.ncbi.nlm.nih.gov/21901702/)
6. Andersen CD, Bennet L, Nystrom L, Lindblad U, Lindholm E, Groop L, et al. Worse glycaemic control in LADA patients than in those with type 2 diabetes, despite a longer time on insulin therapy. *Diabetologia*. 2013; 56: 252–258. doi: [10.1007/s00125-012-2759-y](https://doi.org/10.1007/s00125-012-2759-y) PMID: [23096095](https://pubmed.ncbi.nlm.nih.gov/23096095/)
7. Tiberti C, Yu L, Lucantoni F, Panimolle F, Spagnuolo I, Lenzi A, et al. Detection of four diabetes specific autoantibodies in a single radioimmunoassay: an innovative high-throughput approach for autoimmune diabetes screening. *Clin Exp Immunol*. 2011; 166: 317–324. doi: [10.1111/j.1365-2249.2011.04479.x](https://doi.org/10.1111/j.1365-2249.2011.04479.x) PMID: [22059988](https://pubmed.ncbi.nlm.nih.gov/22059988/)
8. Fourlanos S, Perry C, Stein MS, Stankovich J, Harrison LC, Colman PG. A clinical screening tool identifies autoimmune diabetes in adults. *Diabetes Care*. 2006; 29: 970–975. PMID: [16644622](https://pubmed.ncbi.nlm.nih.gov/16644622/)
9. Zhou Z, Xiang Y, Ji L, Jia W, Ning G, Huang G, et al. Frequency, immunogenetics, and clinical characteristics of latent autoimmune diabetes in China (LADA China study): a nationwide, multicenter, clinic-based cross-sectional study. *Diabetes*. 2013; 62: 543–550. doi: [10.2337/db12-0207](https://doi.org/10.2337/db12-0207) PMID: [23086039](https://pubmed.ncbi.nlm.nih.gov/23086039/)
10. Tiberti C, Giordano C, Locatelli M, Bosi E, Bottazzo GF, Buzzetti R, et al. Identification of tyrosine phosphatase 2(256–760) construct as a new, sensitive marker for the detection of islet autoimmunity in type 2 diabetic patients: the non-insulin requiring autoimmune diabetes (NIRAD) study 2. *Diabetes*. 2008; 57: 1276–1283. doi: [10.2337/db07-0874](https://doi.org/10.2337/db07-0874) PMID: [18332100](https://pubmed.ncbi.nlm.nih.gov/18332100/)
11. Massa O, Alessio M, Russo L, Nardo G, Bonetto V, Bertuzzi F, et al. Serological Proteome Analysis (SERPA) as a tool for the identification of new candidate autoantigens in type 1 diabetes. *J Proteomics*. 2013; 82: 263–273. doi: [10.1016/j.jprot.2013.02.030](https://doi.org/10.1016/j.jprot.2013.02.030) PMID: [23500132](https://pubmed.ncbi.nlm.nih.gov/23500132/)
12. Wenzlau JM, Juhl K, Yu L, Moua O, Sarkar SA, Gottlieb P, et al. The cation efflux transporter ZnT8 (Slc30A8) is a major autoantigen in human type 1 diabetes. *Proc Natl Acad Sci U S A*. 2007; 104: 17040–17045. PMID: [17942684](https://pubmed.ncbi.nlm.nih.gov/17942684/)
13. Tu C, Rudnick PA, Martinez MY, Cheek KL, Stein SE, Slebos RJ, et al. Depletion of abundant plasma proteins and limitations of plasma proteomics. *J Proteome Res*. 2010; 9: 4982–4991. doi: [10.1021/pr100646w](https://doi.org/10.1021/pr100646w) PMID: [20677825](https://pubmed.ncbi.nlm.nih.gov/20677825/)

14. Zhu S, Zhang X, Gao M, Hong G, Yan G, Zhang X. Developing a strong anion exchange/RP (SAX/RP) 2D LC system for high-abundance proteins depletion in human plasma. *Proteomics*. 2012; 12: 3451–3463. doi: [10.1002/pmic.201200036](https://doi.org/10.1002/pmic.201200036) PMID: [23109247](https://pubmed.ncbi.nlm.nih.gov/23109247/)
15. Hyung SW, Piehowski PD, Moore RJ, Orton DJ, Schepmoes AA, Clauss TR, et al. Microscale depletion of high abundance proteins in human biofluids using IgY14 immunoaffinity resin: analysis of human plasma and cerebrospinal fluid. *Anal Bioanal Chem*. 2014; 406: 7117–7125. doi: [10.1007/s00216-014-8058-3](https://doi.org/10.1007/s00216-014-8058-3) PMID: [25192788](https://pubmed.ncbi.nlm.nih.gov/25192788/)
16. Borriello R, Carfora A, Cassandro P, Petrella R. Clinical and Forensic Diagnosis of Very Recent Heroin Intake by 6-acetylmorphine Immunoassay Test and LC-MS/MS Analysis in Urine and Blood. *Ann Clin Lab Sci*. 2015; 45: 414–418. PMID: [26275692](https://pubmed.ncbi.nlm.nih.gov/26275692/)
17. Campos A, Diaz R, Martinez-Bartolome S, Sierra J, Gallardo O, Sabido E, et al. Multicenter experiment for quality control of peptide-centric LC-MS/MS analysis—A longitudinal performance assessment with nLC coupled to orbitrap MS analyzers. *J Proteomics*. 2015; 127: 264–274. doi: [10.1016/j.jprot.2015.05.012](https://doi.org/10.1016/j.jprot.2015.05.012) PMID: [25982386](https://pubmed.ncbi.nlm.nih.gov/25982386/)
18. Brooks-Worrell B, Gersuk VH, Greenbaum C, Palmer JP. Intermolecular antigen spreading occurs during the preclinical period of human type 1 diabetes. *J Immunol*. 2001; 166: 5265–5270. PMID: [11290812](https://pubmed.ncbi.nlm.nih.gov/11290812/)
19. Furlanos S, Dotta F, Greenbaum CJ, Palmer JP, Rolandsson O, Colman PG, et al. Latent autoimmune diabetes in adults (LADA) should be less latent. *Diabetologia*. 2005; 48: 2206–2212. PMID: [16193284](https://pubmed.ncbi.nlm.nih.gov/16193284/)
20. Deeg MA, Bowen RF, Williams MD, Olson LK, Kirk EA, LeBoeuf RC. Increased expression of GPI-specific phospholipase D in mouse models of type 1 diabetes. *Am J Physiol Endocrinol Metab*. 2001; 281: E147–154. PMID: [11404232](https://pubmed.ncbi.nlm.nih.gov/11404232/)
21. Schofield JN, Stephens JW, Hurel SJ, Bell KM, deSouza JB, Rademacher TW. Insulin reduces serum glycosylphosphatidylinositol phospholipase D levels in human type I diabetic patients and streptozotocin diabetic rats. *Mol Genet Metab*. 2002; 75: 154–161. PMID: [11855934](https://pubmed.ncbi.nlm.nih.gov/11855934/)
22. Rhode H, Lopatta E, Schulze M, Pascual C, Schulze HP, Schubert K, et al. Glycosylphosphatidylinositol-specific phospholipase D in blood serum: is the liver the only source of the enzyme? *Clin Chim Acta*. 1999; 281: 127–145. PMID: [10217634](https://pubmed.ncbi.nlm.nih.gov/10217634/)
23. Schofield JN, Rademacher TW. Structure and expression of the human glycosylphosphatidylinositol phospholipase D1 (GPLD1) gene. *Biochim Biophys Acta*. 2000; 1494: 189–194. PMID: [11072085](https://pubmed.ncbi.nlm.nih.gov/11072085/)
24. Chambers JC, Zhang W, Sehmi J, Li X, Wass MN, Van der Harst P, et al. Genome-wide association study identifies loci influencing concentrations of liver enzymes in plasma. *Nat Genet*. 2011; 43: 1131–1138. doi: [10.1038/ng.970](https://doi.org/10.1038/ng.970) PMID: [22001757](https://pubmed.ncbi.nlm.nih.gov/22001757/)
25. Deeg MA, Xuei X, Eckert G, Considine RV, Li YG, Pratt JH. Genetic variation of GPLD1 associates with serum GPI-PLD levels: a preliminary study. *Biochim Biophys Acta*. 2012; 1821: 381–385. doi: [10.1016/j.bbali.2011.12.009](https://doi.org/10.1016/j.bbali.2011.12.009) PMID: [22260953](https://pubmed.ncbi.nlm.nih.gov/22260953/)
26. Mann KJ, Hepworth MR, Raikwar NS, Deeg MA, Sevlever D. Effect of glycosylphosphatidylinositol (GPI)-phospholipase D overexpression on GPI metabolism. *Biochem J*. 2004; 378: 641–648. PMID: [14611645](https://pubmed.ncbi.nlm.nih.gov/14611645/)
27. Zhao P, Nair AV, Hester S, Moremen KW, O'Regan RM, Oprea G, et al. Proteomic identification of glycosylphosphatidylinositol anchor-dependent membrane proteins elevated in breast carcinoma. *J Biol Chem*. 2012; 287: 25230–25240. doi: [10.1074/jbc.M112.339465](https://doi.org/10.1074/jbc.M112.339465) PMID: [22654114](https://pubmed.ncbi.nlm.nih.gov/22654114/)
28. Naghibalhossaini F, Ebadi P. Evidence for CEA release from human colon cancer cells by an endogenous GPI-PLD enzyme. *Cancer Lett*. 2006; 234: 158–167. PMID: [15893415](https://pubmed.ncbi.nlm.nih.gov/15893415/)
29. Pakdel A, Naghibalhossaini F, Mokarram P, Jaberipour M, Hosseini A. Regulation of carcinoembryonic antigen release from colorectal cancer cells. *Mol Biol Rep*. 2012; 39: 3695–3704. doi: [10.1007/s11033-011-1144-0](https://doi.org/10.1007/s11033-011-1144-0) PMID: [21725636](https://pubmed.ncbi.nlm.nih.gov/21725636/)
30. Christgau S, Schierbeck H, Aanstoot HJ, Aagaard L, Begley K, Kofod H, et al. Pancreatic beta cells express two autoantigenic forms of glutamic acid decarboxylase, a 65-kDa hydrophilic form and a 64-kDa amphiphilic form which can be both membrane-bound and soluble. *J Biol Chem*. 1991; 266: 21257–21264. PMID: [1939164](https://pubmed.ncbi.nlm.nih.gov/1939164/)
31. Tozzoli R, Sorrentino MC, Bizzaro N. Detecting multiple autoantibodies to diagnose autoimmune comorbidity (multiple autoimmune syndromes and overlap syndromes): a challenge for the autoimmunologist. *Immunol Res*. 2013; 56: 425–431. doi: [10.1007/s12026-013-8418-7](https://doi.org/10.1007/s12026-013-8418-7) PMID: [23606120](https://pubmed.ncbi.nlm.nih.gov/23606120/)
32. Kucera P, Novakova D, Behanova M, Novak J, Tlaskalova-Hogenova H, Andel M. Gliadin, endomysial and thyroid antibodies in patients with latent autoimmune diabetes of adults (LADA). *Clin Exp Immunol*. 2003; 133: 139–143. PMID: [12823288](https://pubmed.ncbi.nlm.nih.gov/12823288/)

33. Pietropaolo M, Barinas-Mitchell E, Kuller LH. The heterogeneity of diabetes: unraveling a dispute: is systemic inflammation related to islet autoimmunity? *Diabetes*. 2007; 56: 1189–1197. PMID: [17322478](#)
34. Papadopoulos KP, Colovai AI, Maffei A, Jaraquemada D, Suci-Foca N, Harris PE. Tissue-specific self-peptides bound by major histocompatibility complex class I molecules of a human pancreatic beta-cell line. *Diabetes*. 1996; 45: 1761–1765. PMID: [8922363](#)
35. Gray DL, O'Brien KD, D'Alessio DA, Brehm BJ, Deeg MA. Plasma glycosylphosphatidylinositol-specific phospholipase D predicts the change in insulin sensitivity in response to a low-fat but not a low-carbohydrate diet in obese women. *Metabolism*. 2008; 57: 473–478. doi: [10.1016/j.metabol.2007.11.007](#) PMID: [18328347](#)
